# Supplementary material
Source: PubMed Central journal article supplement (PMC6763335)
Supplement: EMS29496-supplement-Supplementary_table.pdf [file EMS29496-supplement-Supplementary_table.pdf]

cat #2

| Dasatinib (nM) | Co    | 10    | 50    | 100  | 250 | 500 | 750 | 1000 |
|----------------|-------|-------|-------|------|-----|-----|-----|------|
|                | 48084 | 42508 | 17088 | 6222 | 343 | 148 | 67  | 79   |
|                | 47954 | 38726 | 18985 | 4287 | 504 | 67  | 86  | 72   |
|                | 48047 | 34990 | 31429 | 6764 | 186 | 75  | 89  | 109  |

| Nilotinib (nM) | Co    | 10    | 50    | 100   | 250  | 500 | 750 | 1000 |
|----------------|-------|-------|-------|-------|------|-----|-----|------|
|                | 45883 | 46301 | 25384 | 22540 | 1729 | 117 | 62  | 71   |
|                | 49013 | 48157 | 28576 | 20942 | 1341 | 64  | 79  | 35   |
|                | 49743 | 49954 | 29620 | 22268 | 2673 | 87  | 64  | 75   |

| Midostaurin (nM) | Co    | 10    | 50    | 100  | 250 | 500 | 750 | 1000 |
|------------------|-------|-------|-------|------|-----|-----|-----|------|
|                  | 51498 | 39744 | 16212 | 3564 | 264 | 226 | 82  | 85   |
|                  | 48661 | 38397 | 16614 | 1748 | 386 | 42  | 48  | 91   |
|                  | 48405 | 41549 | 19899 | 2492 | 441 | 81  | 63  | 98   |

| Imatinib (nM) | Co    | 10  | 50  | 100 | 250 | 500 | 750 | 1000 |
|---------------|-------|-----|-----|-----|-----|-----|-----|------|
|               | 48845 | 237 | 217 | 275 | 119 | 186 | 181 | 45   |
|               | 52334 | 399 | 180 | 228 | 130 | 179 | 142 | 63   |
|               | 48629 | 129 | 103 | 220 | 275 | 186 | 184 | 93   |

<sup>3</sup> H-thymidine uptake in primary neoplastic mast cells, cultured in control medium or with various TKI in counts per minute
